# Supplementary material for: The Importance of Nitric Oxide as the Molecular Basis of the Hydrogen Gas Fumigation-Induced Alleviation of Cd Stress on Ganoderma lucidum
Source: MDPI journal article supplement (doi:10.3390/jof8010010), 2021-12-23
Supplement: s1 [file s1]

## SUPPLEMENTARY TABLES AND FIGURES

**Supplementary Table S1.** The sequences of primers and reference gene used for RT-qPCR in *Ganoderma lucidum*

| Primer        | Sequence (5' to 3')    |
|---------------|------------------------|
| <i>18S-F</i>  | TATCGAGTTCTGACTGGGTTGT |
| <i>18S-R</i>  | ATCCGTTGCTGAAAGTTGTAT  |
| <i>cat1-F</i> | TACGGTATTCAGCTCTTGT    |
| <i>cat1-R</i> | TGTTGTAACGGAACCTCTC    |
| <i>cat2-F</i> | GAAGAGGCGATCACTACCG    |
| <i>cat2-R</i> | GAAACCGATGCCAGGAACA    |
| <i>sod1-F</i> | ATCGCCGTCTTCGTCGTTT    |
| <i>sod1-R</i> | GTGACTGGTGCGGTAGGGA    |
| <i>sod4-F</i> | CTCACCGCGACGCGATTAC    |
| <i>sod4-R</i> | CCCTTGCCCTCAGACTTGG    |
| <i>gr -F</i>  | CGGGACTTGCGTGAATGTTG   |
| <i>gr-R</i>   | TTCTTTGGCACGCATCCTGT   |
| <i>gpx-F</i>  | ATGTCCGACGCAGGATTCTACT |
| <i>gpx-R</i>  | GGAAGCCGAGAATGACGAAG   |

Supplementary Figure S1

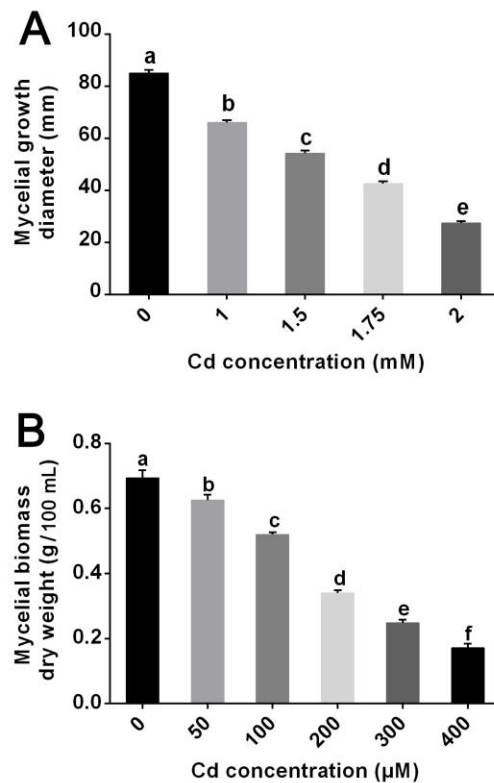

**Supplementary Figure S1.** Effect of different Cd concentrations on mycelial growth of *Ganoderma lucidum*. Mycelia were grown on solid PDA media for 7 d (solid seed). Then 6-mm-diameter mycelial discs from the solid seed were transferred to solid CYM media amended with CdCl<sub>2</sub> at different concentrations 0, 1, 1.5, 1.75, or 2 mM and incubated for 8 d at 28°C in the dark. Meanwhile, sets of 8 mycelial discs were cut from the solid seed and each set was inoculated into 100 mL liquid CYM media with CdCl<sub>2</sub> at different concentrations 0, 50, 100, 200, 300, or 400 μM and grown for 8 d in shaking incubator at 28°C in the dark. After that, the diameter of mycelial growth (A) or the mycelial biomass dry weight (B) was determined. Values are the means ± SD of three independent experiments with at least three biological replicates for each. Bars with different letters are significantly different at  $P < 0.05$  according to one-way ANOVA with multiple comparison using Tukey's test.

Supplementary Figure S2

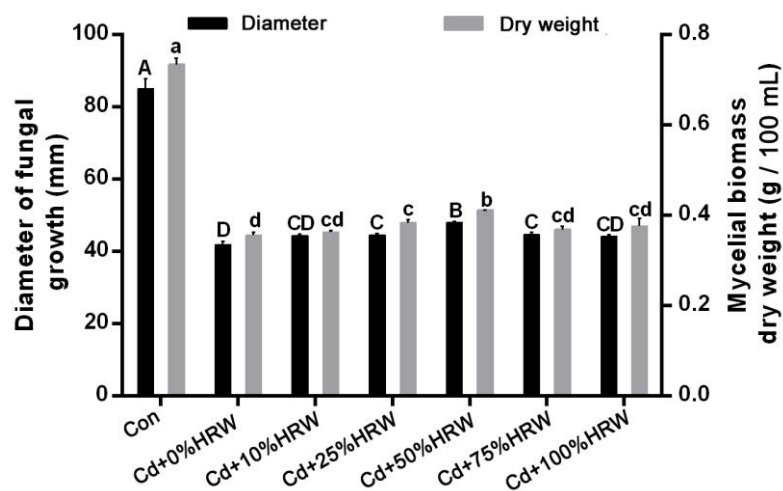

**Supplementary Figure S2.** Screening for the optimum HRW concentration for the alleviation of Cd stress on *G. lucidum*. Mycelial inocula were grown on solid CYM media for 2 d. On the 3<sup>rd</sup> day, mycelia were pre-treated with 10%, 25%, 50%, 75% or 100% HRW for 24 h or not treated with HRW altogether. On the 4<sup>th</sup> day, 6-mm-diameter mycelial discs from HRW treated or non-treated mycelia were grown on solid CYM media amended with 1.75 mM CdCl<sub>2</sub> for 8 d. Meanwhile, other mycelia were grown on solid CYM without CdCl<sub>2</sub> for 8 d (Con). Afterward, the diameters of the mycelial growth were detected (left). Simultaneously, on the 4<sup>th</sup> day, sets of 8 identical mycelial discs were cut from the HRW-treated or non-treated mycelia, and each set was inoculated into Cd-stressed liquid CYM, and then were cultivated in shaking incubator for 8 d in the dark. Then the biomass dry weight values were immediately measured (right). Mycelia without chemical treatments were used as control (Con). Values are the means  $\pm$  SD of three independent experiments with at least three biological replicates for each. Bars with different letters are significantly different at  $P < 0.05$  according to one-way ANOVA with multiple comparison using Tukey's test.

Supplementary Figure S3

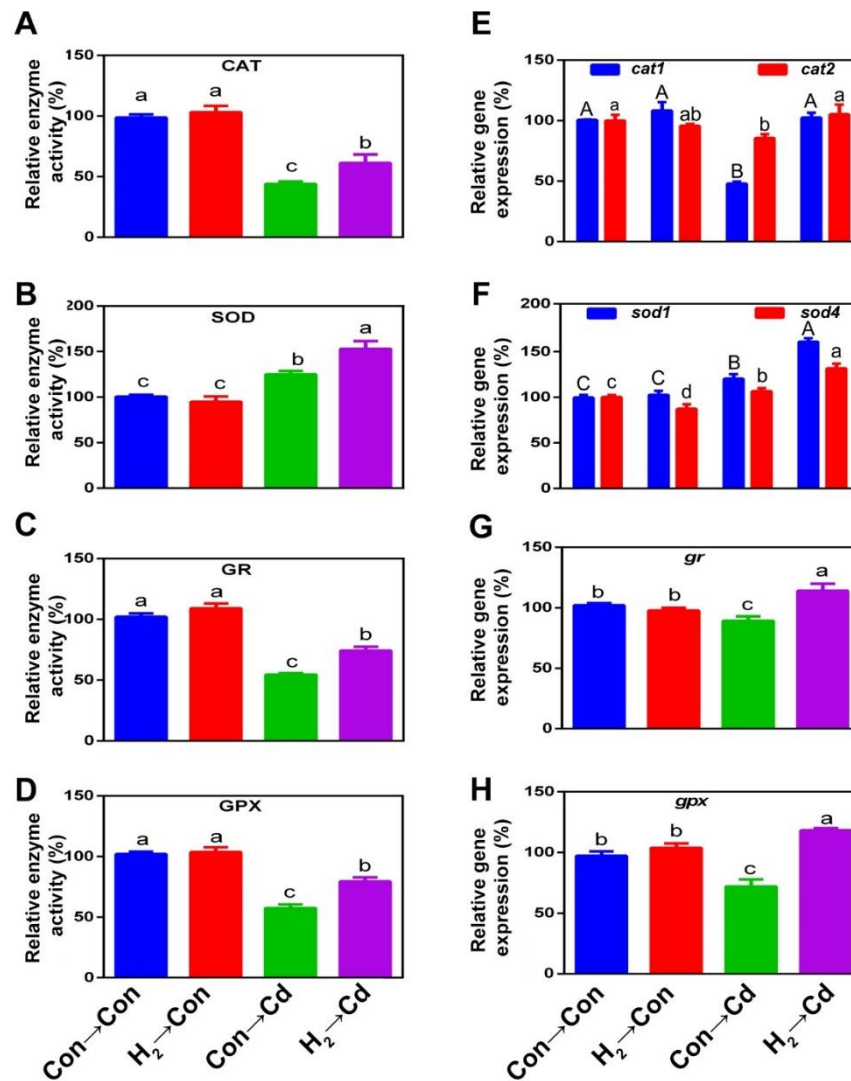

**Supplementary Figure S3.** H<sub>2</sub>-fumigation enhanced the antioxidant enzyme activities and their corresponding transcript levels under oxidative stress caused by Cd stress. Two-day-old mycelia were pre-treated or not with 3% H<sub>2</sub> for 24 h; Then, 6-mm-diameter mycelial discs from these mycelia were grown on solid CYM media (normal condition) or CdCl<sub>2</sub>-containing solid CYM (stress treatment) for 12 or 24 h, then the enzymatic activities of CAT, SOD, GR, and GPX were measured in the 24 h-stressed or unstressed mycelia (A–D). The transcript levels of these antioxidant enzymes were also measured in the 12 h stressed or unstressed mycelia (E–H). The transcript levels detected by RT-qPCR were represented as values relative to the control sample. Mycelia without chemicals were used as control. Values are means ± SD of three independent experiments with three biological replicates for each. Bars with different letters are significantly different at  $P < 0.05$  according to one-way ANOVA with multiple comparison using Tukey's test.

**Supplementary Figure S4**

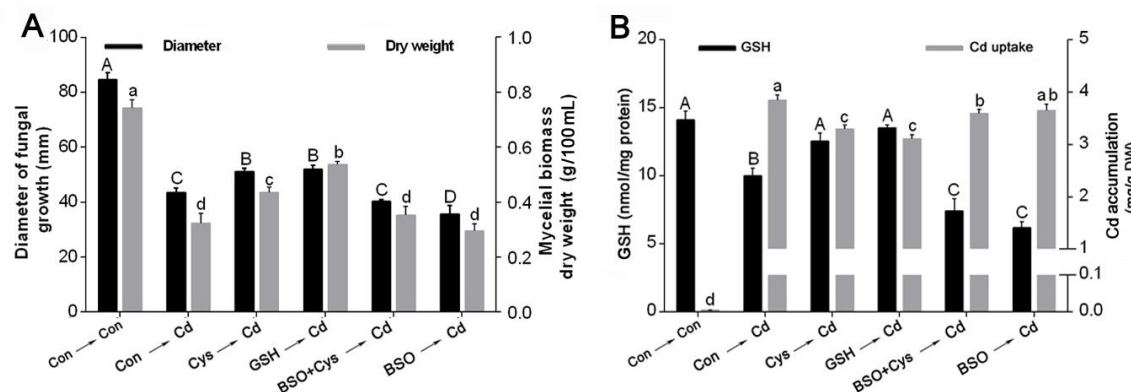

**Supplementary Figure S4.** Exogenous cysteine (Cys) alleviated the growth inhibition caused by Cd stress on *G. lucidum*. Mycelia were cultured on Solid CYM media for 2 d. On the 3<sup>rd</sup> day, mycelia were either pre-treated or not with 300  $\mu$ M Cys or 325  $\mu$ M GSH, each for 24 h. Meanwhile, other samples were subjected to 2.5 mM BSO for 1 h alone or before Cys treatment. On the 4<sup>th</sup> day, 6mm diameter mycelial discs from these different treatments were grown on stressed or non-stressed solid or liquid CYM media for 8 d. Afterward, the mycelial growth diameter (A; left) and biomass dry weight (A; right) values were determined. Simultaneously, on the 4<sup>th</sup> day, other sets of mycelia from the different treatments were either stressed or not for 24 h or 5 d, then were analyzed for GSH and Cd contents, respectively (B). Mycelia without chemicals were represented as Con → Con. Values are means  $\pm$  SD of three independent experiments with three biological replicates for each. Bars with different letters are significantly different at  $P < 0.05$  according to one-way ANOVA with multiple comparison using Tukey's test.

## Supplementary Figure S5

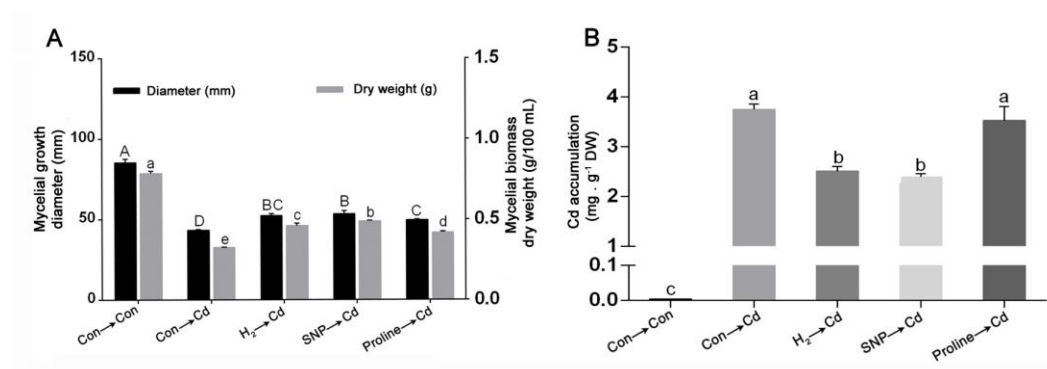

**Supplementary Figure S5.** Proline alleviated the growth inhibition caused by Cd stress on *G. lucidum*. Mycelia were cultured on solid CYM media for 2 d. Then on the 3<sup>rd</sup> day, mycelia were either pre-treated or not with 3% H<sub>2</sub> fumigation for 24 h. On the 4<sup>th</sup> day, 6-mm-diameter mycelial disc(s) from the H<sub>2</sub> treated or non-treated mycelia were grown on stressed or non-stressed solid or liquid CYM media for 8 d then the mycelial growth diameter (A; left) or mycelial biomass dry weight (A; right) values were determined. Simultaneously, on the 4<sup>th</sup> day, another set of mycelial discs were grown for 5 d on stressed or non-stressed solid CYM, then Cd uptake was analyzed (B). In both (A) and (B), the non-fumigated stressed samples were either pre-treated or not with 500  $\mu$ M SNP for 30 min, or 10  $\mu$ M Proline for 12 h before Cd exposure. Mycelia without chemicals were represented as Con → Con. Values are means  $\pm$  SD of three independent experiments with three biological replicates for each. Bars with different letters are significantly different at  $P < 0.05$  according to one-way ANOVA with multiple comparison using Tukey's test.

Supplementary Figure S6

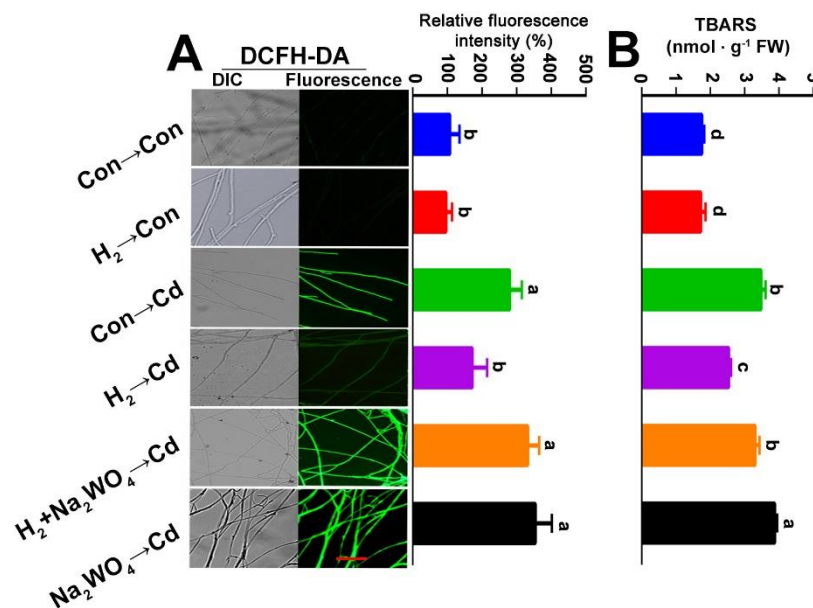

**Supplementary Figure S6.** H<sub>2</sub>-induced reestablishment of redox homeostasis was susceptible to Na<sub>2</sub>WO<sub>4</sub>. 2 d old mycelia were either pre-treated or not with 3% H<sub>2</sub> fumigation for 24 h. Stressed mycelia were either pre-treated or not with 500 μM Na<sub>2</sub>WO<sub>4</sub> for 30 min alone or after H<sub>2</sub> pre-treatment. Then, 6-mm-diameter mycelial discs from the different treatments were cut and grown on solid CYM media (normal condition) or CdCl<sub>2</sub>-containing solid CYM (stress treatment) for 5 d. Afterward, the mycelia were loaded with DCFH-DA for ROS fluorescence analysis (A). Scale bar = 100 μm. DIC, differential interference contrast. Meanwhile, TBARS contents were also determined (B). Mycelia without chemicals were used as the control for each analysis Con → Con, while H<sub>2</sub> alone treated mycelia were represented as H<sub>2</sub> → Con. Values are the means ± SD of three independent experiments with at least three biological replicates for each. Bars with different letters are significantly different at *P* < 0.05 according one-way ANOVA with multiple comparison using Tukey's test.

Supplementary Figure S7

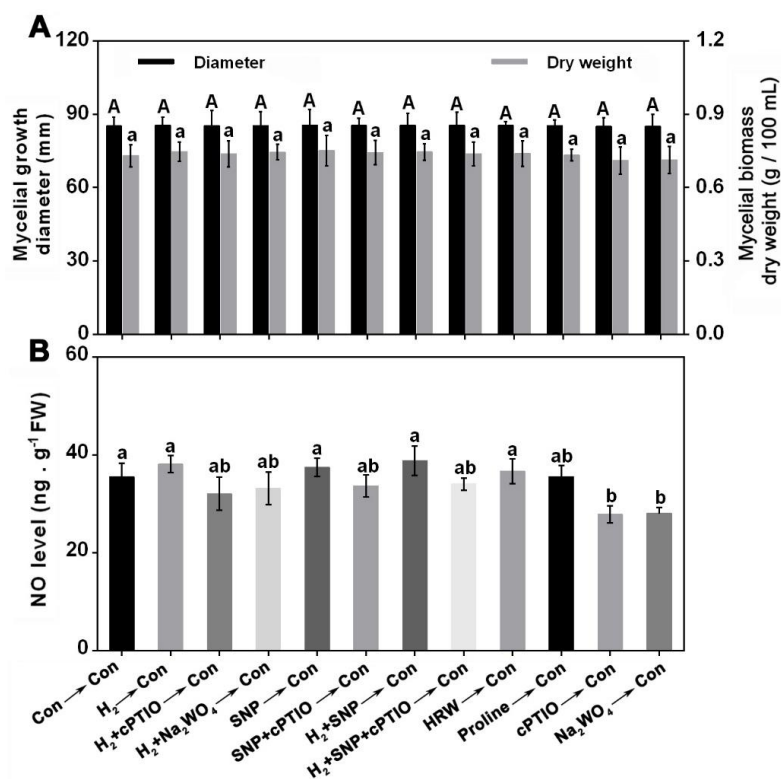

**Supplementary Figure S7.** H<sub>2</sub>, HRW, SNP, NO's scavenger, cPTIO, Na<sub>2</sub>WO<sub>4</sub> or proline had no significant effect on mycelial growth or NO content under normal conditions. Mycelial inocula were grown on solid CYM media for 2 d. On the 3rd day, mycelia were either pre-treated or not with 3% H<sub>2</sub>, 50% HRW, each for 24 h; or 10 μM proline for 12 h. H<sub>2</sub> treated or non-treated mycelia were either treated or not with 500 μM SNP, 500 μM cPTIO or 500 μM Na<sub>2</sub>WO<sub>4</sub> alone or in the indicated combinations. Mycelial discs from the different treatments were grown for 12 hours or 8 days on solid or liquid CYM media. Values of growth diameter and the biomass dry weight in the eight-day-old mycelia were measured (A). Twelve-hour-old mycelia were analyzed for NO contents by Griess reagent assay (B). Bars with different letters are significantly different at  $P < 0.05$  according to one-way ANOVA with multiple comparison using Tukey's test.
